# Supplementary material for: Determining the Innovativeness of Nurses Who Engage in Activities That Encourage Innovative Behaviors
Source: MDPI journal article supplement (doi:10.3390/nursrep14020066), 2024-04-03
Supplement: s1 [file s1]

**Table S1.** Exploratory Factor Analysis across Individual Characteristics.

|                                                                          | <b>Factor 1</b><br>(risk aversion) | <b>t</b> | <b>df</b> | <b>p-value</b> | <b>Factor 2</b><br>(willingness to try new things) | <b>t</b> | <b>df</b> | <b>p-value</b> |
|--------------------------------------------------------------------------|------------------------------------|----------|-----------|----------------|----------------------------------------------------|----------|-----------|----------------|
| Age, n=295                                                               | r=0.19                             |          |           | 0.001          | r=0.11                                             |          |           | 0.07           |
| Gender                                                                   |                                    | 1.27     | 295       | 0.21           |                                                    | 0.63     | 295       | 0.53           |
| Female, n=264                                                            | .02±0.87                           |          |           |                | 0.02±0.66                                          |          |           |                |
| Male, n=33                                                               | -.19±1.1                           |          |           |                | -0.07±1.3                                          |          |           |                |
| Race                                                                     |                                    | 1.56     | 3, 301    | 0.81           |                                                    | 6.42     | 3, 301    | 0.40           |
| Asian, n=22                                                              | -0.16±0.80                         |          |           |                | 0.15±0.52                                          |          |           |                |
| Black, n=36                                                              | -0.08±1.0                          |          |           |                | -0.11±0.68                                         |          |           |                |
| Other, n=13                                                              | -0.03±0.95                         |          |           |                | -0.22±0.85                                         |          |           |                |
| White, n=234                                                             | 0.01±0.89                          |          |           |                | 0.03±0.78                                          |          |           |                |
| Hispanic                                                                 |                                    | 0.83     | 298       | 0.41           |                                                    | 0.34     | 298       | 0.74           |
| No, n=285                                                                | 0.01±0.88                          |          |           |                | 0.01±0.76                                          |          |           |                |
| Yes, n=15                                                                | -0.19±1.0                          |          |           |                | -0.06±0.77                                         |          |           |                |
| Highest Level of Education                                               |                                    | 3.09     | 3, 302    | 0.38           |                                                    | 31.29    | 3, 302    | <0.001*        |
| Baccalaureate, n=52                                                      | 0.07±0.91                          |          |           |                | -0.14±0.72                                         |          |           |                |
| Masters, n=122                                                           | -0.04±0.83                         |          |           |                | 0.06±0.60                                          |          |           |                |
| DNP, n=45                                                                | 0.11±0.93                          |          |           |                | 0.07±0.63                                          |          |           |                |
| PhD, n=87                                                                | -0.10±0.98                         |          |           |                | 0.01±1.0                                           |          |           |                |
| Licensure                                                                |                                    | 0.06     | 304       | 0.95           |                                                    | -0.20    | 304       | 0.84           |
| RN, n=254                                                                | -0.02±0.90                         |          |           |                | 0.02±0.77                                          |          |           |                |
| Other, n=52                                                              | -0.01±0.93                         |          |           |                | -0.01±0.71                                         |          |           |                |
| From What Type of Program Did You Receive Your Initial Nursing Education |                                    | 1.15     | 3, 297    | 0.92           |                                                    | 42.12    | 3, 297    | 0.39           |
| Associate, n=49                                                          | -0.01±0.95                         |          |           |                | -0.06±1.2                                          |          |           |                |
| Baccalaureate, n=202                                                     | -0.01±0.86                         |          |           |                | 0.03±0.64                                          |          |           |                |
| Diploma, n=23                                                            | 0.08±0.94                          |          |           |                | -0.02±0.71                                         |          |           |                |
| Graduate, n=27                                                           | -0.10±0.83                         |          |           |                | 0.12±0.59                                          |          |           |                |
| Do you view self as an Innovator                                         |                                    | -1.25    | 324       | 0.21           |                                                    | -3.20    | 324       | 0.002          |
| Yes, n=285                                                               | 0.02±0.87                          |          |           |                | 0.05±0.76                                          |          |           |                |
| No, n=41                                                                 | -0.17±1.05                         |          |           |                | -0.40±1.3                                          |          |           |                |
| Are you satisfied with your current position as a nurse                  |                                    | -0.21    | 301       | 0.83           |                                                    | -1.59    | 301       | 0.11           |
| Yes, n=222                                                               | -0.01±0.92                         |          |           |                | 0.06±0.64                                          |          |           |                |
| No, n=81                                                                 | -0.03±0.87                         |          |           |                | -0.10±1.03                                         |          |           |                |
| Are you satisfied with your current institution                          |                                    | -0.05    | 301       | 0.96           |                                                    | -2.01    | 301       | 0.05           |
| Yes, n=223                                                               | -0.02±0.89                         |          |           |                | 0.07±0.64                                          |          |           |                |
| No, n=80                                                                 | -0.02±0.93                         |          |           |                | -0.13±1.0                                          |          |           |                |
| Do you feel supported by your Nurse Colleagues                           |                                    | -0.97    | 294       | 0.34           |                                                    | -3.22    | 294       | 0.001          |
| Yes, n=257                                                               | 0.001±0.91                         |          |           |                | 0.08±0.62                                          |          |           |                |
| No, n=39                                                                 | -0.15±0.86                         |          |           |                | -0.34±1.3                                          |          |           |                |

|                                                                                                                                |                                                    |       |        |       |                                                  |       |        |         |
|--------------------------------------------------------------------------------------------------------------------------------|----------------------------------------------------|-------|--------|-------|--------------------------------------------------|-------|--------|---------|
| Do you feel supported by your Nurse Manager<br>Yes, n=217<br>No, n=71                                                          | -0.03±0.87<br>-0.04±0.99                           | -0.13 | 286    | 0.89  | 0.08±0.64<br>-0.17±1.1                           | -2.33 | 286    | 0.02    |
| Do you feel supported by your Executive Leadership<br>Yes, n=190<br>No, n=108                                                  | -0.02±0.89<br>-0.02±0.93                           | -0.01 | 296    | 0.99  | 0.10±0.62<br>-0.12±0.95                          | -2.41 | 296    | 0.02    |
| How Many Innovation Events Have you Participated in in the last year<br>1, n=111<br>2-3, n=119<br>4-5, n=46<br>6 or more, n=45 | -0.08±0.98<br>-0.05±0.86<br>0.26±0.68<br>0.15±0.79 | 8.59  | 3, 317 | 0.04* | -0.08±0.74<br>-0.01±0.87<br>-0.05±1.3<br>.29±.42 | 54.41 | 3, 317 | <0.001* |
| In the past 1 year, have you been exposed to human-centered design/design thinking Activities<br>Yes, n=224<br>No, n=100       | -0.01±0.86<br>0.01±0.98                            | -2.20 | 323    | 0.03  | 0.02±0.79<br>-0.04±0.98                          | -0.57 | 323    | 0.57    |
| In the past 1 year, have you been exposed to human-centered design/design thinking Lectures<br>Yes, n=209<br>No, n=116         | 0.08±0.80<br>-0.15±1.0                             | 0.24  | 322    | 0.81  | 0.03±0.78<br>-0.08±1.0                           | -1.12 | 322    | 0.26    |
| In the past 1 year, have you been exposed to human-centered design/design thinking Other<br>Yes, n=81<br>No, n=227             | 0.12±0.79<br>-0.05±0.93                            | -1.44 | 306    | 0.15  | 0.06±0.60<br>0.01±0.83                           | -0.53 | 306    | 0.60    |
| In the past 1 year, have you been exposed to human-centered design/design thinking Projects<br>Yes, n=199<br>No, n=125         | 0.02±0.84<br>-0.04±1.0                             | -0.54 | 322    | 0.59  | 0.009±0.80<br>-0.02±0.96                         | -0.32 | 322    | 0.75    |
| In the past 1 year, have you been exposed to human-centered design/design thinking Resources<br>Yes, n=211<br>No, n=113        | 0.04±0.85<br>-0.09±1.0                             | -1.22 | 322    | 0.22  | 0.02±0.78<br>-0.04±0.99                          | -0.56 | 322    | 0.57    |
| In the past 1 year, have you been exposed to human-centered design/design thinking Workshops                                   |                                                    | -0.73 | 321    | 0.47  |                                                  | -0.88 | 321    | 0.38    |

|                                                                         |                       |      |     |       |                         |      |     |      |
|-------------------------------------------------------------------------|-----------------------|------|-----|-------|-------------------------|------|-----|------|
| Yes, n=174                                                              | 0.03±0.81             |      |     |       | 0.04±0.62               |      |     |      |
| No, n=149                                                               | -0.05±1.0             |      |     |       | -0.05±1.1               |      |     |      |
| How many years have you worked in Nursing? n=297                        | r=0.13                |      |     | 0.02  | r=0.14                  |      |     | 0.02 |
| How many years have you worked as a clinician? n=294                    | r=0.15                |      |     | 0.01  | r=0.06                  |      |     | 0.30 |
| How many years have you been working at your current institution? n=296 | r=0.06                |      |     | 0.32  | r=0.06                  |      |     | 0.05 |
| Employment Status                                                       |                       | 2.77 | 291 | 0.006 |                         | 0.89 | 291 | 0.38 |
| Employed in healthcare, n=260                                           |                       |      |     |       |                         |      |     |      |
| Employed but not in healthcare, n=33                                    | .03±0.84<br>-0.41±1.0 |      |     |       | 0.04±0.78<br>-0.09±0.64 |      |     |      |

\*Overall, there is a difference in the means but no difference in pairwise analysis.

|                                                                          | <b>Factor 3</b><br>(creativity and originality) | <b>t</b> | <b>df</b> | <b>p-value</b> | <b>Factor 4</b><br>(being challenged) | <b>t</b> | <b>df</b> | <b>p-value</b> |
|--------------------------------------------------------------------------|-------------------------------------------------|----------|-----------|----------------|---------------------------------------|----------|-----------|----------------|
| Age, n=295                                                               | .r=0.10                                         |          |           | 0.07           | r=0.07                                |          |           | 0.27           |
| Gender                                                                   |                                                 | -1.77    | 295       | p=0.08         |                                       | 1.11     | 295       | 0.27           |
| Female, n=264                                                            | -0.03±0.78                                      |          |           |                | 0.01±0.88                             |          |           |                |
| Male, n=33                                                               | 0.24±1.0                                        |          |           |                | -0.17±1.0                             |          |           |                |
| Race                                                                     |                                                 | 1.67     | 3, 301    | 0.64           |                                       | 4.85     | 3, 301    | 0.18           |
| Asian, n=22                                                              | -0.12±0.95                                      |          |           |                | -0.23±0.90                            |          |           |                |
| Black, n=36                                                              | -0.03±0.85                                      |          |           |                | -0.06±0.70                            |          |           |                |
| Other, n=13                                                              | 0.32±0.77                                       |          |           |                | -0.14±1.1                             |          |           |                |
| White, n=234                                                             | 0.004±0.7                                       |          |           |                | 0.04±0.91                             |          |           |                |
| Hispanic                                                                 |                                                 | -1.42    | 298       | 0.16           |                                       | -0.59    | 298       | 0.56           |
| Yes, n=15                                                                | 0.29±0.70                                       |          |           |                | 0.14±0.60                             |          |           |                |
| No, n=285                                                                | -0.01±0.82                                      |          |           |                | -0.002±0.91                           |          |           |                |
| Highest Level of Education                                               |                                                 | 4.35     | 3, 302    | 0.23           |                                       | 9.04     | 3, 203    | 0.03*          |
| Baccalaureate, n=52                                                      | -0.024±0.83                                     |          |           |                | 0.01±0.96                             |          |           |                |
| Masters, n=122                                                           | 0.02±0.85                                       |          |           |                | 0.03±0.78                             |          |           |                |
| DNP, n=45                                                                | 0.09±0.65                                       |          |           |                | -0.11±0.99                            |          |           |                |
| PhD, n=87                                                                | -0.04±0.84                                      |          |           |                | -0.02±1.0                             |          |           |                |
| Licensure                                                                |                                                 | 0.75     | 304       | 0.45           |                                       | -0.69    | 304       | 0.49           |
| RN, n=254                                                                | -0.01±0.80                                      |          |           |                | 0.006±0.91                            |          |           |                |
| Other, n=52                                                              | 0.09±0.86                                       |          |           |                | -0.09±0.93                            |          |           |                |
| From What Type of Program Did You Receive Your Initial Nursing Education |                                                 | 0.35     | 3, 297    | 0.95           |                                       | 4.93     | 3, 297    | 0.18           |
| Associate, n=49                                                          | 0.05±0.81                                       |          |           |                | 0.05±0.81                             |          |           |                |
| Baccalaureate, n=202                                                     | -0.06±0.81                                      |          |           |                | -0.06±0.81                            |          |           |                |
| Diploma, n=23                                                            | 0.22±0.75                                       |          |           |                | 0.22±0.75                             |          |           |                |
| Graduate, n=27                                                           | 0.19±0.84                                       |          |           |                | 0.19±0.84                             |          |           |                |
| Do you view self as an Innovator                                         |                                                 | -6.13    | 324       | <0.001         |                                       | -1.25    | 324       | 0.21           |

|                                                                                                                                             |                                                   |       |        |      |                                                  |       |        |         |
|---------------------------------------------------------------------------------------------------------------------------------------------|---------------------------------------------------|-------|--------|------|--------------------------------------------------|-------|--------|---------|
| Yes, n=285<br>No, n=41                                                                                                                      | 0.11±0.74<br>-0.69±1.0                            |       |        |      | 0.02±0.90<br>-0.17±1.1                           |       |        |         |
| Are you satisfied with your current position as a nurse<br>Yes, n=222<br>No, n=81                                                           | -0.02±0.79<br>0.08±0.86                           | 0.93  | 301    | 0.36 | -0.02±0.94<br>-0.02±0.86                         | 0.003 | 301    | 0.99    |
| Are you satisfied with your current institution<br>No, n=80<br>Yes, n=223                                                                   | 0.12±0.81<br>-0.03±0.81                           | 1.44  | 301    | 0.15 | -0.004±0.84<br>-0.02±0.95                        | 0.14  | 301    | 0.89    |
| Do you feel supported by your Nurse Colleagues<br>Yes, n=257<br>No, n=39                                                                    | -0.03±0.78<br>0.22±0.99                           | 1.78  | 294    | 0.08 | 0.01±0.88<br>-0.09±0.90                          | -0.64 | 294    | 0.52    |
| Do you feel supported by your Nurse Manager<br>Yes, n=217<br>No, n=71                                                                       | -0.07±.81<br>.18±.83                              | 2.18  | 286    | 0.03 | -.02±.89<br>.04±.80                              | 0.49  | 286    | 0.63    |
| Do you feel supported by your Executive Leadership<br>Yes, n=190<br>No, n=108                                                               | -0.03±0.80<br>0.03±0.85                           | 0.56  | 296    | 0.58 | -0.03±0.93<br>0.03±0.82                          | 0.51  | 296    | 0.61    |
| How Many Innovation Events Have you Participated in in the last year, n=45<br>1, n=111<br>2-3, n=119<br>4-5, n=46<br>6 or more <sup>a</sup> | -0.18±0.91<br>0.08±0.76<br>0.04±0.88<br>0.25±0.59 | 12.04 | 3, 317 | 0.01 | 0.08±0.73<br>-0.16±1.1<br>0.04±0.86<br>0.18±0.80 | 18.10 | 3, 317 | <0.001* |
| In the past 1 year, have you been exposed to human-centered design/design thinking Activities<br>Yes, n=224<br>No, n=100                    | 0.08±0.72<br>-0.10±0.98                           | -1.84 | 323    | 0.07 | 0.04±0.91<br>-0.07±0.93                          | -1.00 | 323    | 0.32    |
| In the past 1 year, have you been exposed to human-centered design/design thinking Lectures<br>Yes, n=209<br>No, n=116                      | -0.002±0.82<br>0.05±0.86                          | 0.41  | 322    | 0.68 | 0.07±0.85<br>-0.17±1.1                           | -2.16 | 322    | 0.03    |
| In the past 1 year, have you been exposed to human-centered design/design thinking Other<br>Yes, n=81<br>No, n=227                          | 0.21±0.80<br>-0.04±0.80                           | -2.41 | 306    | 0.02 | 0.02±0.98<br>-0.001±0.90                         | -0.16 | 306    | 0.87    |

|                                                                                                                         |                         |       |     |      |                            |       |     |      |
|-------------------------------------------------------------------------------------------------------------------------|-------------------------|-------|-----|------|----------------------------|-------|-----|------|
| In the past 1 year, have you been exposed to human-centered design/design thinking Projects<br>Yes, n=199<br>No, n=125  | 0.05±0.79<br>-0.06±0.88 | -1.16 | 322 | 0.25 | -0.01±0.92<br>0.02±0.92    | 0.29  | 322 | 0.78 |
| In the past 1 year, have you been exposed to human-centered design/design thinking Resources<br>Yes, n=211<br>No, n=113 | 0.06±0.78<br>-0.09±0.90 | -1.58 | 322 | 0.12 | -0.003±0.93<br>-0.001±0.90 | 0.02  | 322 | 0.99 |
| In the past 1 year, have you been exposed to human-centered design/design thinking Workshops<br>Yes, n=174<br>No, n=149 | 0.10±0.68<br>-0.09±0.96 | -2.07 | 321 | 0.04 | 0.08±0.86<br>-0.10±0.98    | -1.80 | 321 | 0.07 |
| How many years have you worked in Nursing?, n=297                                                                       | r=0.01                  |       |     | 0.93 | r=0.09                     |       |     | 0.15 |
| How many years have you worked as a clinician?, n=294                                                                   | r=0.06                  |       |     | 0.28 | r=0.12                     |       |     | 0.05 |
| How many years have you been working at your current institution? n=296                                                 | r=0.06                  |       |     | 0.47 | r=0.12                     |       |     | 0.07 |
| Employment Status<br>Employed in healthcare, n=260<br>Employed but not in healthcare, n=33                              | 0.02±0.80<br>-0.28±0.88 | 2.01  | 291 | 0.05 | 0.001±0.91<br>0.09±0.73    | -0.52 | 291 | 0.60 |

\*Overall, there is a difference in the means but no difference in pairwise analysis; a, Tukey Test found differences in “How Many Innovation Events Have you Participated in in the last year” 6+ vs. 1 (p=0.02).

**Table S2.** Exploratory Factory Analysis across Organizational Characteristics.

|                                                                                                                                                                       | <b>Factor 1</b><br>(risk<br>aversion)              | <b>t</b> | <b>df</b> | <b>p-value</b> | <b>Factor 2</b><br>(willingness to<br>try new<br>things) | <b>t</b> | <b>df</b> | <b>p-value</b> |
|-----------------------------------------------------------------------------------------------------------------------------------------------------------------------|----------------------------------------------------|----------|-----------|----------------|----------------------------------------------------------|----------|-----------|----------------|
| In what type of setting is your institution located<br>Rural, n=20<br>Suburban, n=61<br>Urban, n=193<br>Other, n=24                                                   | 0.06±0.93<br>-0.11±1.1<br>-0.007±0.81<br>0.19±0.80 | 8.07     | 3, 294    | 0.05*          | 0.07±0.60<br>0.05±1.1<br>-0.01±0.67<br>0.21±0.52         | 31.29    | 3, 294    | <0.001*        |
| Do you work in a hospital<br>Yes, n=129<br>No, n=171                                                                                                                  | -0.01±0.88<br>-0.01±0.87                           | -0.02    | 298       | 0.98           | -0.03±0.94<br>0.06±0.58                                  | 0.94     | 298       | 0.35           |
| Magnet Status, if working in a hospital<br>Yes, n=126<br>No, n=56                                                                                                     | -0.12±0.91<br>0.01±0.89                            | 1.53     | 180       | 0.13           | 0.01±0.68<br>-0.07±1.1                                   | -0.63    | 180       | 0.53           |
| Do you consider your institution to be innovative<br>Yes, n=212<br>No, n=85                                                                                           | 0.03±0.83<br>-0.10±0.99                            | -1.16    | 295       | 0.25           | 0.07±0.62<br>-0.07±1.0                                   | -1.43    | 296       | 0.15           |
| Does your institution support innovative thinking by its nurses?<br>Yes, n=219<br>No, n=77                                                                            | 0.04±0.84<br>-0.15±0.96                            | -1.60    | 294       | 0.11           | 0.08±0.63<br>-0.16±1.0                                   | -2.47    | 294       | 0.01           |
| Do you get protected time away from the bedside to work on other projects?<br>Yes, n=56<br>No, n=79                                                                   | -0.06±0.88<br>-0.07±0.97                           | -0.09    | 133       | 0.93           | 0.11±0.61<br>-0.10±1.0                                   | -1.39    | 133       | 0.17           |
| How willing are you to implement innovative methodologies in your day-to-day work<br>Very, n=176<br>Mostly, n=108<br>Somewhat, n=35<br>Rarely, n=3<br>Not at all, n=1 | r=0.29                                             |          |           | 0.0001         | r=0.17                                                   |          |           | 0.002*         |
| How often are you able to implement innovative methodologies in your day-to-day work<br>Always, n=28<br>Often, n=121<br>Sometimes, n=137<br>Rarely, n=32              | r=0.11                                             |          |           | 0.06           | r=0.19                                                   |          |           | 0.0006*        |

|                                                                                                                                                                                       |         |  |  |      |         |  |  |        |
|---------------------------------------------------------------------------------------------------------------------------------------------------------------------------------------|---------|--|--|------|---------|--|--|--------|
| Never, n=6                                                                                                                                                                            |         |  |  |      |         |  |  |        |
| How often do you encounter obstacles that impede you from being innovative in your day-to-day work?<br>Always, n=29<br>Often, n=140<br>Sometimes, n=128<br>Rarely, n=25<br>Never, n=1 | r=-0.06 |  |  | 0.25 | r=-0.05 |  |  | 0.38   |
| How satisfied are you with your Independence at work<br>Very Satisfied, n=197<br>Moderately Satisfied, n=70<br>A little Dissatisfied, n=20<br>Very Dissatisfied, n=11                 | r=0.07  |  |  | 0.24 | r=0.02  |  |  | 0.78   |
| How satisfied are you with your Opportunities for advancement<br>Very Satisfied, n=104<br>Moderately Satisfied, n=101<br>A little Dissatisfied, n=52<br>Very Dissatisfied, n=39       | r=0.06  |  |  | 0.33 | r=0.99  |  |  | 0.09   |
| How satisfied are you with your Opportunities to be creative<br>Very Satisfied, n=122<br>Moderately Satisfied, n=93<br>A little Dissatisfied, n=43<br>Very Dissatisfied, n=30         | r=0.03  |  |  | 0.67 | r=0.17  |  |  | 0.004  |
| How satisfied are you with your Opportunities to be innovative<br>Very Satisfied, n=121<br>Moderately Satisfied, n=89<br>A little Dissatisfied, n=50<br>Very Dissatisfied, n=40       | r=0.02  |  |  | 0.69 | r=0.17  |  |  | 0.004  |
| How satisfied are you with your Opportunities to lead<br>Very Satisfied, n=133<br>Moderately Satisfied, n=98<br>A little Dissatisfied, n=39<br>Very Dissatisfied, n=28                | r=0.02  |  |  | 0.78 | r=0.20  |  |  | 0.0005 |
| How satisfied are you with your Time away from clinical responsibilities<br>Very Satisfied, n=106<br>Moderately Satisfied, n=76<br>A little Dissatisfied, n=45                        | r=-0.01 |  |  | 0.90 | r=0.11  |  |  | 0.08   |

|                                                                                                                                                                |                          |       |     |      |                         |       |     |       |
|----------------------------------------------------------------------------------------------------------------------------------------------------------------|--------------------------|-------|-----|------|-------------------------|-------|-----|-------|
| Very Dissatisfied, n=58                                                                                                                                        |                          |       |     |      |                         |       |     |       |
| How satisfied are you with your Work schedule<br>Very Satisfied, n=168<br>Moderately Satisfied, n=90<br>A little Dissatisfied, n=29<br>Very Dissatisfied, n=12 | r=0.03                   |       |     | 0.57 | r=0.14                  |       |     | 0.02  |
| How would you rate the Relationship with co-workers<br>Excellent, n=147<br>Good, n=124<br>Fair, n=19<br>Poor, n=8                                              | r=0.01                   |       |     | 0.93 | r=0.15                  |       |     | 0.01  |
| How would you rate the Adequacy of resources<br>Excellent, n=95<br>Good, n=135<br>Fair, n=53<br>Poor, n=15                                                     | r=0.01                   |       |     | 0.93 | r=0.15                  |       |     | 0.01  |
| How would you rate the Overall work environment<br>Excellent, n=116<br>Good, n=123<br>Fair, n=54<br>Poor, n=5                                                  | r=0.02                   |       |     | 0.75 | r=0.18                  |       |     | 0.002 |
| How would you rate Support from supervisors<br>Excellent, n=128<br>Good, n=96<br>Fair, n=46<br>Poor, n=26                                                      | r=-0.02                  |       |     | 0.75 | r=0.17                  |       |     | 0.004 |
| Has your institution offered any of the following innovation resources<br>Yes, n=174<br>No, n=108                                                              | -0.01±0.81<br>-0.04±0.99 | -0.31 | 280 | 0.76 | 0.12±0.61<br>-0.12±0.94 | -2.57 | 280 | 0.01  |
| Has your institution offered any of the following innovation education<br>Yes, n=166<br>No, n=118                                                              | 0.06±0.79<br>-0.12±0.97  | -1.77 | 282 | 0.08 | 0.10±0.64<br>-0.08±0.91 | -1.98 | 282 | 0.05  |
| Has your institution offered any of the following innovation workshops<br>Yes, n=139<br>No, n=144                                                              | 0.03±0.79<br>-0.06±0.95  | -0.87 | 281 | 0.39 | 0.12±0.60<br>-0.08±0.89 | -2.18 | 281 | 0.03  |
| Has your institution offered any of the following Innovation lectures                                                                                          |                          | -2.22 | 282 | 0.03 |                         | -2.64 | 282 | 0.01  |



|                                                                    |            |       |     |      |            |       |     |       |
|--------------------------------------------------------------------|------------|-------|-----|------|------------|-------|-----|-------|
| Yes, n=156                                                         | 0.08±0.78  |       |     |      | 0.13±0.61  |       |     |       |
| No, n=128                                                          | -0.15±0.97 |       |     |      | -0.11±0.91 |       |     |       |
| Has your institution offered any of the following HCD/DT education |            | -1.99 | 291 | 0.05 |            | -3.02 | 281 | 0.003 |
| Yes, n=107                                                         | 0.11±0.74  |       |     |      | 0.20±0.55  |       |     |       |
| No, n=176                                                          | -0.10±0.95 |       |     |      | -0.08±0.86 |       |     |       |
| Has your institution offered any of the following HCD/DT lectures  |            | -1.79 | 281 | 0.08 |            | -2.68 | 281 | 0.01  |
| Yes, n=156                                                         | 0.11±0.73  |       |     |      | 0.18±0.56  |       |     |       |
| No, n=199                                                          | -0.09±0.94 |       |     |      | -0.07±0.85 |       |     |       |
| Has your institution offered any of the following HCD/DT resources |            | -1.46 | 280 | 0.15 |            | -3.49 | 280 | 0.001 |
| Yes, n=119                                                         | 0.06±0.72  |       |     |      | 0.20±0.56  |       |     |       |
| No, n=163                                                          | -0.09±0.96 |       |     |      | -0.07±0.69 |       |     |       |
| Has your institution offered any of the following HCD/DT workshops |            | -1.29 | 281 | 0.20 |            | -1.86 | 281 | 0.06  |
| Yes, n=100                                                         | 0.07±0.75  |       |     |      | 0.14±0.62  |       |     |       |
| No, n=183                                                          | -0.07±0.94 |       |     |      | -0.04±0.83 |       |     |       |
| Has your institution offered any of the following HCD/DT Other     |            | -1.37 | 253 | 0.17 |            | -1.77 | 253 | 0.08  |
| Yes, n=56                                                          | 0.13±0.77  |       |     |      | 0.19±0.55  |       |     |       |
| No, n=199                                                          | -0.06±0.93 |       |     |      | -0.01±0.81 |       |     |       |

|                                                     | <b>Factor 3</b><br>(creativity and originality ) | <b>t</b> | <b>df</b> | <b>p-value</b> | <b>Factor 4</b><br>(being challenged) | <b>t</b> | <b>df</b> | <b>p-value</b> |
|-----------------------------------------------------|--------------------------------------------------|----------|-----------|----------------|---------------------------------------|----------|-----------|----------------|
| In what type of setting is your institution located |                                                  | 10.58    | 3, 294    | 0.01           |                                       | 1.23     | 3, 294    | 0.75           |
| Rural, n=20                                         | 0.049±0.86                                       |          |           |                | -0.08±1.0                             |          |           |                |
| Suburban, n=61                                      | -0.25±0.97                                       |          |           |                | 0.01±0.85                             |          |           |                |
| Urban, n=193                                        | 0.03±0.76                                        |          |           |                | -0.01±0.91                            |          |           |                |
| Other, n=24                                         | 0.38±0.56                                        |          |           |                | 0.19±0.97                             |          |           |                |
| Do you work in a hospital                           |                                                  | 1.21     | 298       | 0.23           |                                       | 1.84     | 298       | 0.07           |
| Yes, n=129                                          | -0.06±0.84                                       |          |           |                | -0.10±0.99                            |          |           |                |
| No, n=171                                           | 0.05±0.79                                        |          |           |                | 0.09±0.83                             |          |           |                |
| Magnet Status, if working in a hospital             |                                                  | -0.46    | 180       | 0.65           |                                       | -0.20    | 180       | 0.84           |
| Yes, n=126                                          | -0.06±0.77                                       |          |           |                | -0.04±0.92                            |          |           |                |
| No, n=56                                            | -0.13±1.1                                        |          |           |                | -0.08±0.88                            |          |           |                |
| Do you consider your institution to be innovative   |                                                  | -0.09    | 295       | 0.93           |                                       | 0.44     | 295       | 0.66           |
| Yes, n=212                                          | 0.01±0.76                                        |          |           |                | -0.01±0.93                            |          |           |                |

|                                                                                                                                                                                       |                          |      |     |        |                         |       |     |       |
|---------------------------------------------------------------------------------------------------------------------------------------------------------------------------------------|--------------------------|------|-----|--------|-------------------------|-------|-----|-------|
| No, n=85                                                                                                                                                                              | -0.002±0.94              |      |     |        | 0.04±0.85               |       |     |       |
| Does your institution support innovative thinking by its nurses?<br>Yes, n=219<br>No, n=77                                                                                            | 0.003±0.77<br>0.01±0.95  | 0.09 | 294 | 0.93   | 0.02±0.89<br>-0.07±0.96 | -0.77 | 294 | 0.44  |
| Do you get protected time away from the bedside to work on other projects?<br>Yes, n=56<br>No, n=79                                                                                   | -0.01±0.80<br>-0.01±0.93 | 0.01 | 133 | 0.99   | 0.01±0.84<br>-0.17±1.0  | -1.06 | 133 | 0.29  |
| How willing are you to implement innovative methodologies in your day-to-day work<br>Very, n=176<br>Mostly, n=108<br>Somewhat, n=35<br>Rarely, n=3<br>Not at all, n=1                 | r=0.21                   |      |     | 0.0002 | r=-0.03                 |       |     | 0.57  |
| How often are you able to implement innovative methodologies in your day-to-day work<br>Always, n=28<br>Often, n=121<br>Sometimes, n=137<br>Rarely, n=32<br>Never, n=6                | r=0.15                   |      |     | 0.005  | r=-0.05                 |       |     | =0.42 |
| How often do you encounter obstacles that impede you from being innovative in your day-to-day work?<br>Always, n=29<br>Often, n=140<br>Sometimes, n=128<br>Rarely, n=25<br>Never, n=1 | r=0.01                   |      |     | 0.83   | r=-0.05                 |       |     | 0.36  |
| How satisfied are you with your Independence at work<br>Very Satisfied, n=197<br>Moderately Satisfied, n=70<br>A little Dissatisfied, n=20<br>Very Dissatisfied, n=11                 | r=-0.11                  |      |     | 0.06   | r=0.07                  |       |     | 0.26  |
| How satisfied are you with your Opportunities for advancement<br>Very Satisfied, n=104<br>Moderately Satisfied, n=101                                                                 | r=-0.05                  |      |     | 0.35   | r=0.0767                |       |     | 0.19  |

|                                                                                                                                                                                           |         |  |  |      |         |  |      |
|-------------------------------------------------------------------------------------------------------------------------------------------------------------------------------------------|---------|--|--|------|---------|--|------|
| A little Dissatisfied, n=52<br>Very Dissatisfied, n=39                                                                                                                                    |         |  |  |      |         |  |      |
| How satisfied are you with your Opportunities to be creative<br>Very Satisfied, n=122<br>Moderately Satisfied, n=93<br>A little Dissatisfied, n=43<br>Very Dissatisfied, n=30             | r=-0.02 |  |  | 0.72 | r=0.032 |  | 0.58 |
| How satisfied are you with your Opportunities to be innovative<br>Very Satisfied, n=121<br>Moderately Satisfied, n=89<br>A little Dissatisfied, n=50<br>Very Dissatisfied, n=40           | r=0.02  |  |  | 0.80 | r=-0.01 |  | 0.86 |
| How satisfied are you with your Opportunities to lead<br>Very Satisfied, n=133<br>Moderately Satisfied, n=98<br>A little Dissatisfied, n=39<br>Very Dissatisfied, n=28                    | r=-0.10 |  |  | 0.08 | r=0.002 |  | 0.98 |
| How satisfied are you with your Time away from clinical responsibilities<br>Very Satisfied, n=106<br>Moderately Satisfied, n=76<br>A little Dissatisfied, n=45<br>Very Dissatisfied, n=58 | r=-0.08 |  |  | 0.18 | r=-0.01 |  | 0.88 |
| How satisfied are you with your Work schedule<br>Very Satisfied, n=168<br>Moderately Satisfied, n=90<br>A little Dissatisfied, n=29<br>Very Dissatisfied, n=12                            | r=0.03  |  |  | 0.60 | r=0.14  |  | 0.02 |
| How would you rate the Relationship with co-workers<br>Excellent, n=147<br>Good, n=124<br>Fair, n=19<br>Poor, n=8                                                                         | r=-0.06 |  |  | 0.29 | r=0.02  |  | 0.76 |
| How would you rate the Adequacy of resources<br>Excellent, n=95<br>Good, n=135<br>Fair, n=53<br>Poor, n=15                                                                                | r=-0.06 |  |  | 0.29 | r=0.02  |  | 0.76 |
| How would you rate the Overall work environment                                                                                                                                           |         |  |  | 0.60 |         |  | 0.07 |

|                                                                                                           |                         |       |     |      |                          |       |     |      |
|-----------------------------------------------------------------------------------------------------------|-------------------------|-------|-----|------|--------------------------|-------|-----|------|
| Excellent, n=116<br>Good, n=123<br>Fair, n=54<br>Poor, n=5                                                | r=-0.03                 |       |     |      | r=0.11                   |       |     |      |
| How would you rate Support from supervisors<br>Excellent, n=128<br>Good, n=96<br>Fair, n=46<br>Poor, n=26 | r=-0.12                 |       |     | 0.04 | r=0.07                   |       |     | 0.21 |
| Has your institution offered any of the following innovation resources<br>Yes, n=174<br>No, n=108         | -0.03±0.77<br>0.01±0.89 | 0.38  | 280 | 0.70 | 0.04±0.88<br>0.0002±0.87 | -0.38 | 280 | 0.70 |
| Has your institution offered any of the following innovation education<br>Yes, n=166<br>No, n=118         | 0.06±0.72<br>-0.11±0.93 | -1.74 | 282 | 0.08 | 0.003±0.89<br>0.06±0.85  | 0.49  | 282 | 0.62 |
| Has your institution offered any of the following innovation workshops<br>Yes, n=139<br>No, n=144         | 0.06±0.72<br>-0.09±0.90 | -1.45 | 281 | 0.15 | 0.03±0.88<br>0.02±0.87   | -0.11 | 281 | 0.91 |
| Has your institution offered any of the following Innovation lectures<br>Yes, n=156<br>No, n=128          | 0.04±0.72<br>-0.08±0.92 | -1.28 | 282 | 0.20 | 0.02±0.92<br>0.03±0.81   | 0.09  | 282 | 0.93 |
| Has your institution offered any of the following HCD/DT education<br>Yes, n=107<br>No, n=176             | 0.05±0.76<br>-0.05±0.85 | -0.91 | 281 | 0.37 | -0.01±0.92<br>0.05±0.85  | 0.51  | 281 | 0.61 |
| Has your institution offered any of the following HCD/DT lectures<br>Yes, n=156<br>No, n=199              | 0.08±0.72<br>-0.06±0.86 | -1.45 | 281 | 0.15 | 0.02±0.88<br>0.03±0.87   | 0.02  | 281 | 0.98 |
| Has your institution offered any of the following HCD/DT resources<br>Yes, n=119<br>No, n=163             | 0.04±0.75<br>-0.03±0.82 | -0.74 | 280 | 0.46 | 0.03±0.92<br>0.04±0.82   | 0.13  | 280 | 0.90 |
| Has your institution offered any of the following HCD/DT workshops<br>Yes, n=100                          | 0.08±0.74               | -1.38 | 281 | 0.17 | -0.004±0.90              | 0.40  | 281 | 0.69 |

|                                                                |            |       |     |      |           |      |     |      |
|----------------------------------------------------------------|------------|-------|-----|------|-----------|------|-----|------|
| No, n=183                                                      | -0.06±0.85 |       |     |      | 0.04±0.86 |      |     |      |
| Has your institution offered any of the following HCD/DT Other |            | -0.07 | 253 | 0.95 |           | 1.35 | 253 | 0.18 |
| Yes, n=56                                                      | -0.01±0.71 |       |     |      | -0.14±1.0 |      |     |      |
| No, n=199                                                      | -0.03±0.84 |       |     |      | 0.04±0.85 |      |     |      |

\*Overall, there is a difference in the means but no difference in pairwise analysis; a Tukey Test found differences in “In what type of setting is your institution located” Other versus Suburban (p=0.007).
